# Supplementary material for: Semisynthesis and Biological Evaluation of Oleanolic Acid 3-O-β-d-Glucuronopyranoside Derivatives for Protecting H9c2 Cardiomyoblasts against H2O2-Induced Injury
Source: MDPI journal article supplement (doi:10.3390/molecules23010044), 2018-01-10
Supplement: s1 [file s1]

# Semisynthesis and Biological Evaluation of Oleanolic Acid 3-O- $\beta$ -D-Glucuronopyranoside Derivatives for Protecting H9c2 Cardiomyoblasts against H<sub>2</sub>O<sub>2</sub>-Induced Injury

Yu Tian <sup>1</sup>, Zhonghao Sun <sup>1</sup>, Wenqian Wang <sup>2</sup>, Hai Shang <sup>1</sup>, Baoqi Wang <sup>3</sup>, Di Deng <sup>3</sup>, Guoxu Ma <sup>1</sup>, Haifeng Wu <sup>1</sup>, Nailiang Zhu <sup>1</sup>, Xudong Xu <sup>1,\*</sup>, Guibo Sun <sup>1,\*</sup> and Xiaobo Sun <sup>1,\*</sup>

- <sup>1</sup> Beijing Key Laboratory of Innovative Drug Discovery of Traditional Chinese Medicine (Natural Medicine) and Translational Medicine; Key Laboratory of Bioactive Substances and Resources Utilization of Chinese Herbal Medicine, Ministry of Education; Key Laboratory of Efficacy Evaluation of Chinese Medicine against Glycolipid Metabolic Disorders, State Administration of Traditional Chinese Medicine; Zhong guan cun Open Laboratory of the Research and Development of Natural Medicine and Health Products; Institute of Medicinal Plant Development, Chinese Academy of Medical Sciences & Peking Union Medical College, Beijing 100193, China; ytian@implad.ac.cn (Y.T.); sun\_zhonghao@126.com (Z.-H.S.); hshang@implad.ac.cn (H.S.); mgxfl8785@163.com (G.-X.M.); hfwu@implad.ac.cn (H.-F.W.); zhu13liang@126.com (N.-L.Z.)
- <sup>2</sup> Tianjin Institute of Pharmaceutical Research, Tianjin 300193, China; wangwq@tjpr.com
- <sup>3</sup> Center of Research and Development on Life Sciences and Environment Sciences, Harbin University of Commerce, Harbin 150076, Heilongjiang, China; 13115539201@163.com (B.-Q.W); 18745112039@163.com (D.D.)
- \* Correspondence: xdxu@implad.ac.cn (X.-D.X.), gbsun@implad.ac.cn (G.-B.S.), sunsubmit@163.com (X.-B.S.); Tel./Fax: +86-10-5783-3290 (X.-D.X.)

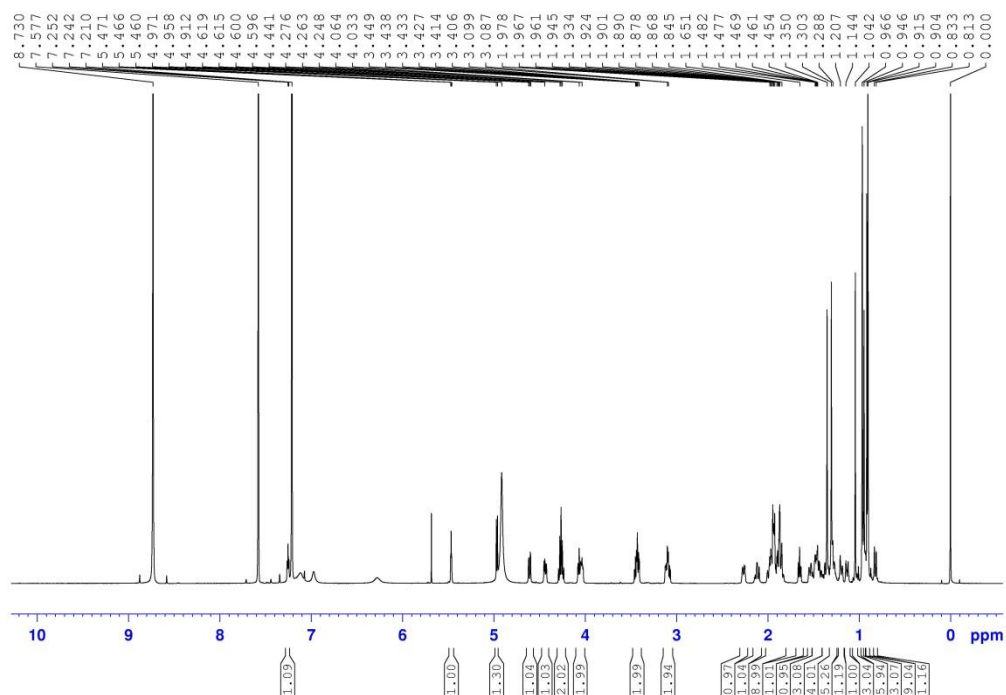

**Figure S1**  $^1\text{H}$  NMR of compound **5a**

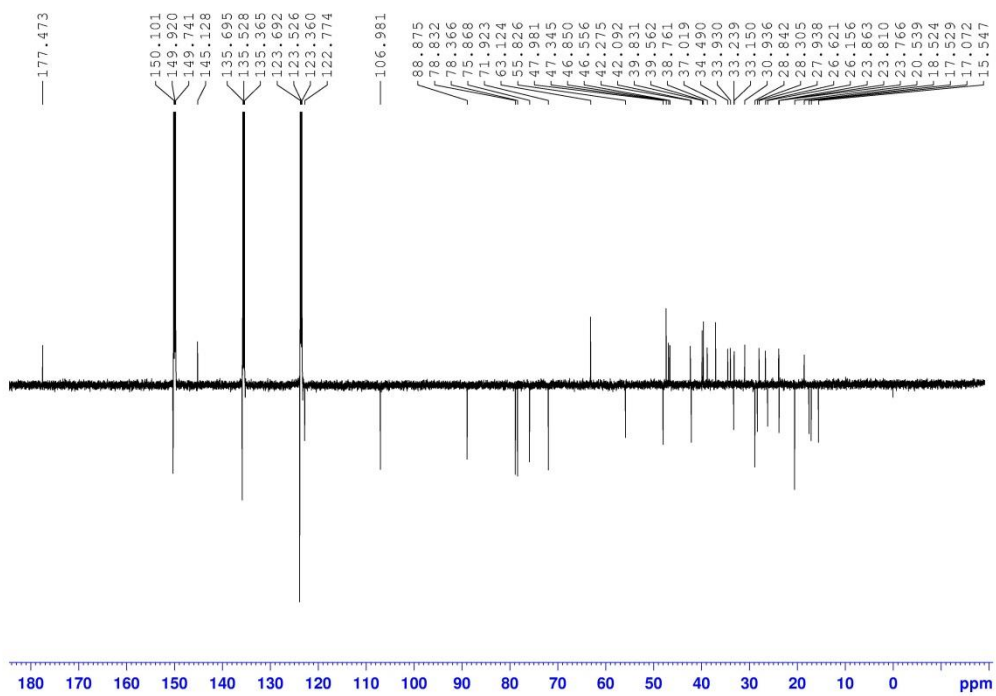

**Figure S2**  $^{13}\text{C}$  NMR of compound **5a**

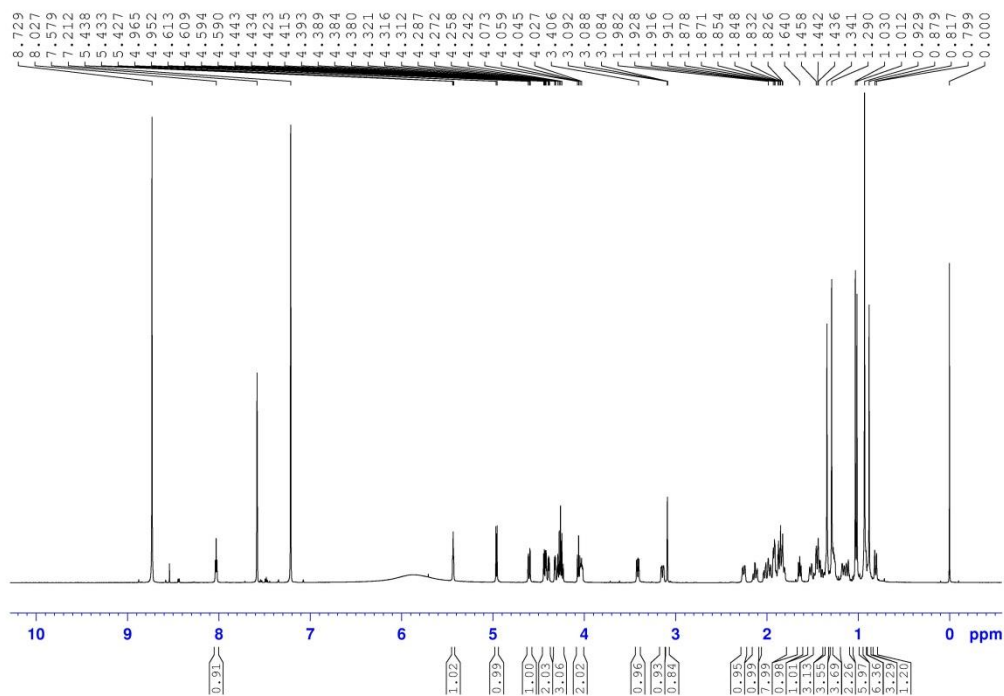

**Figure S3**  $^1\text{H}$  NMR of compound **5b**

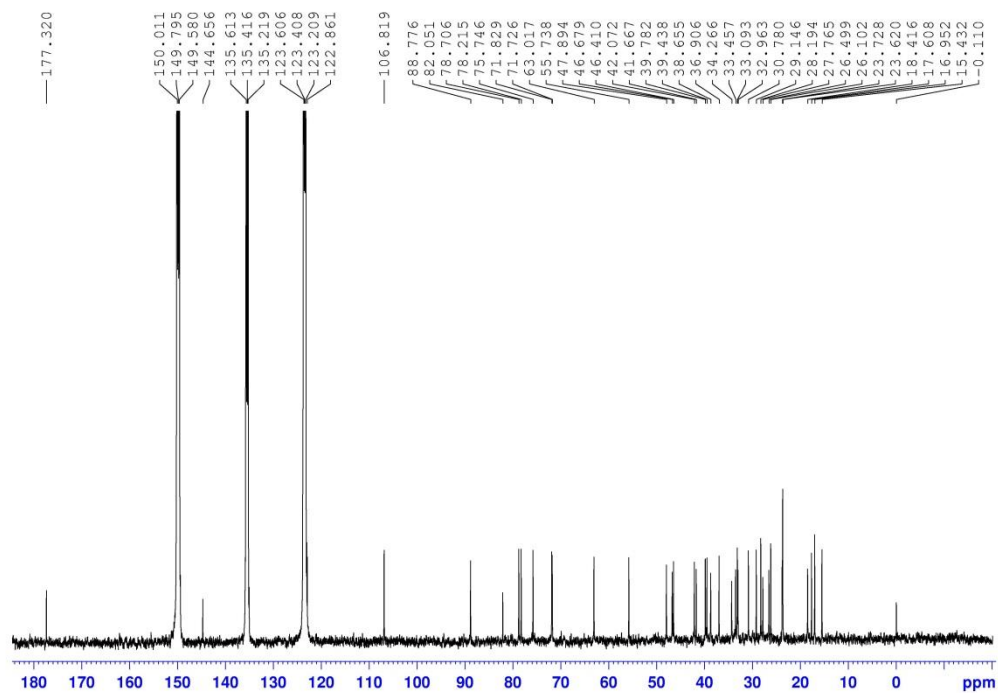

**Figure S4**  $^{13}\text{C}$  NMR of compound **5b**

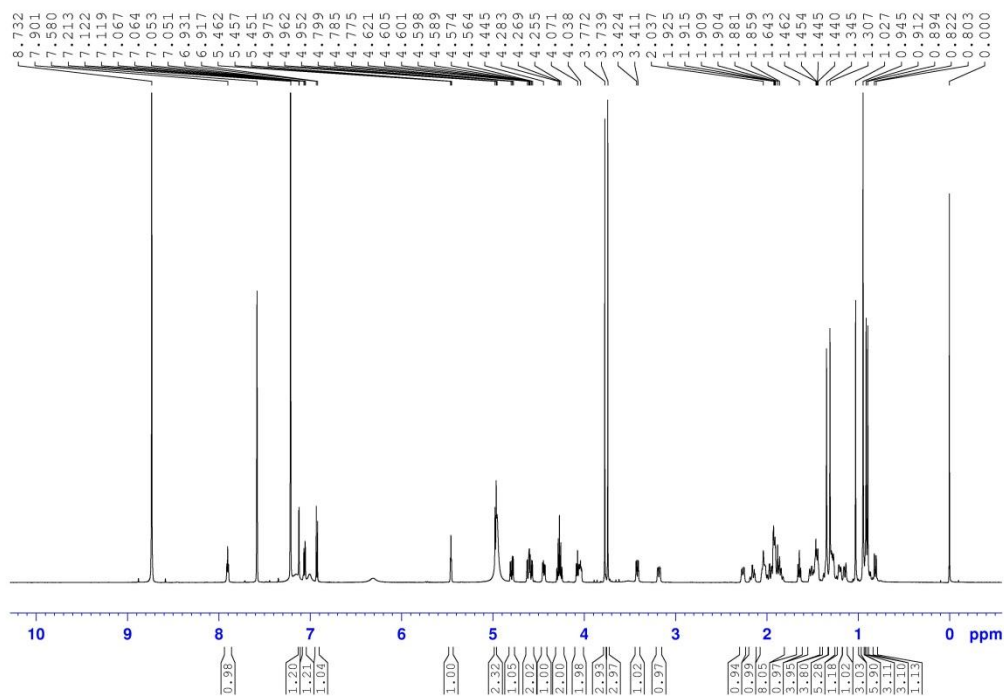

**Figure S5**  $^1\text{H}$  NMR of compound **5c**

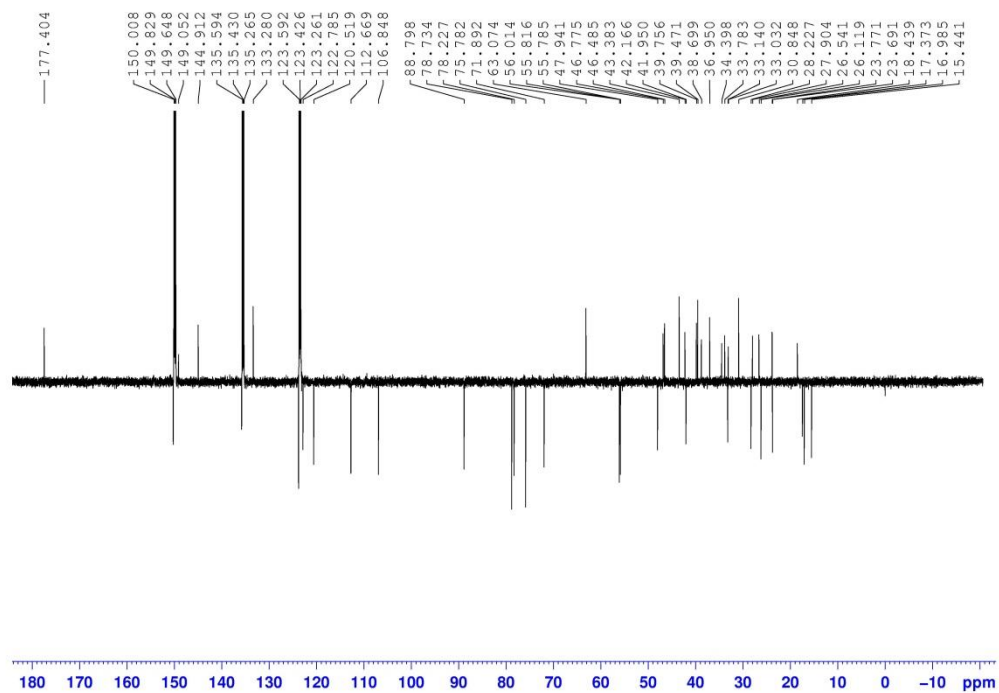

**Figure S6**  $^{13}\text{C}$  NMR of compound **5c**

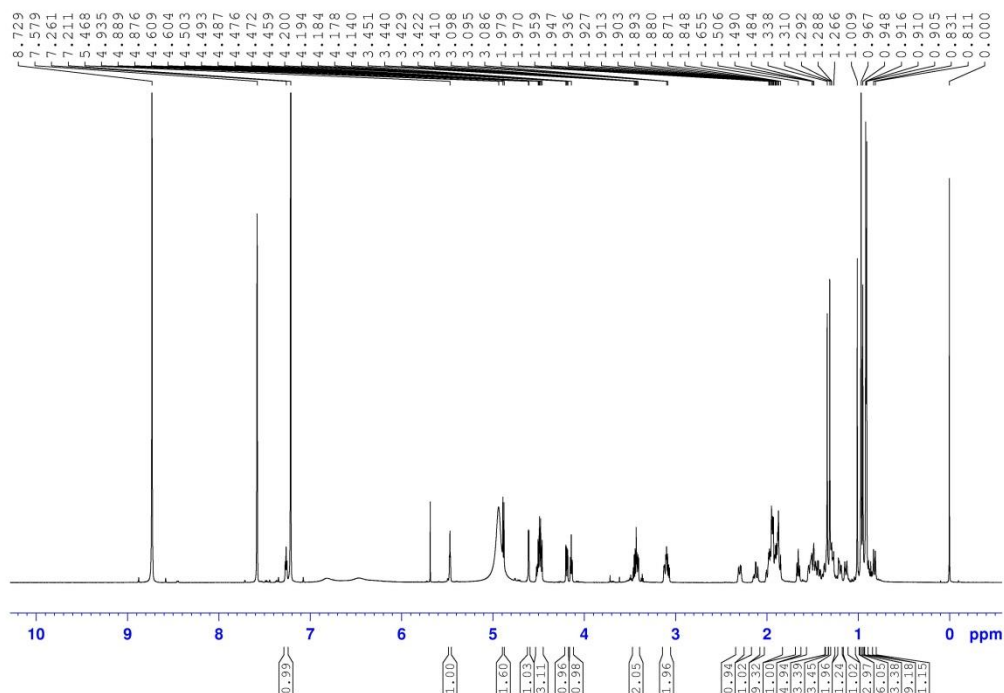

**Figure S7**  $^1\text{H}$  NMR of compound **6a**

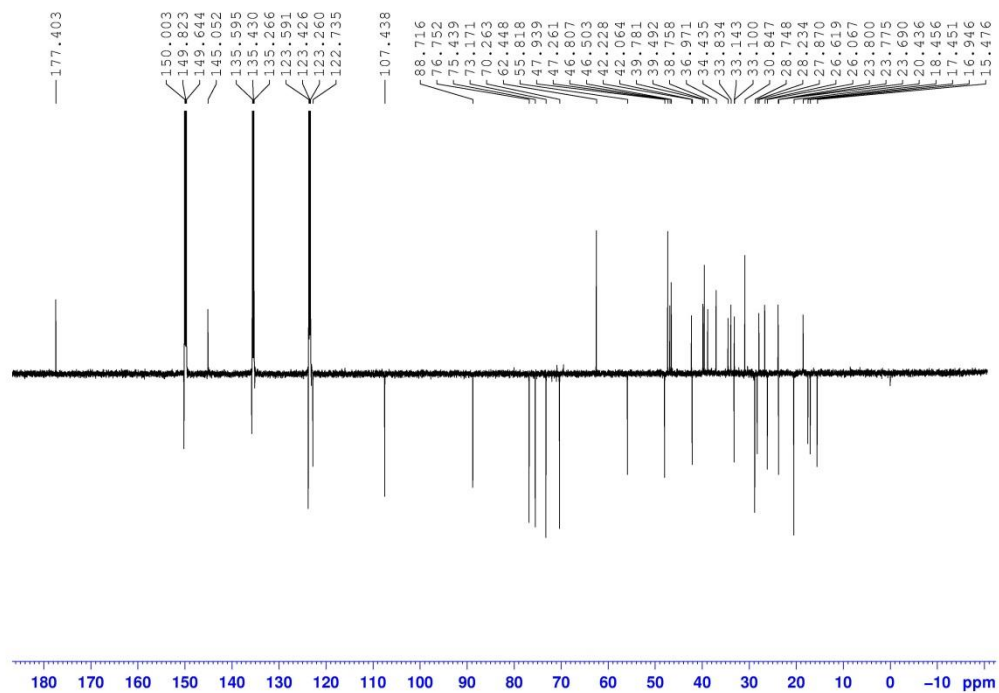

**Figure S8**  $^{13}\text{C}$  NMR of compound **6a**

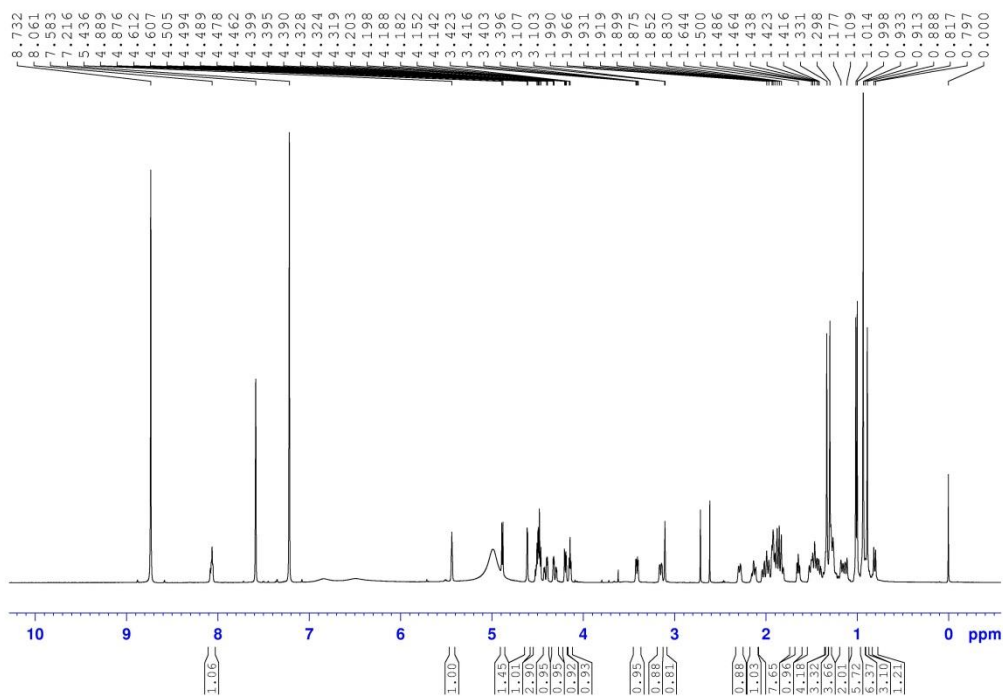

**Figure S9**  $^1\text{H}$  NMR of compound **6b**

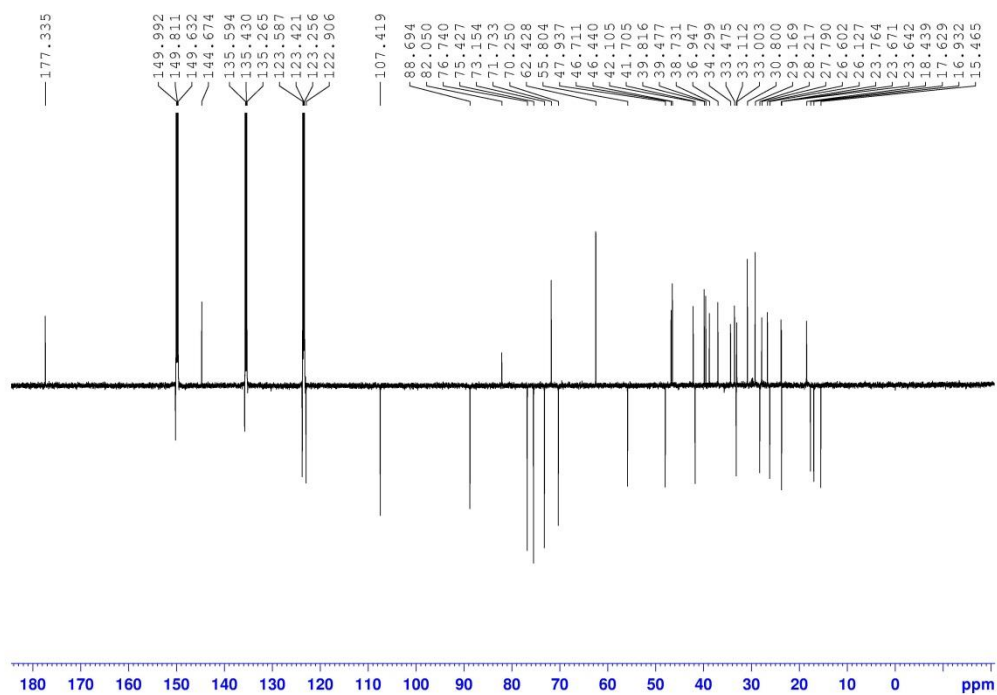

**Figure S10**  $^{13}\text{C}$  NMR of compound **6b**

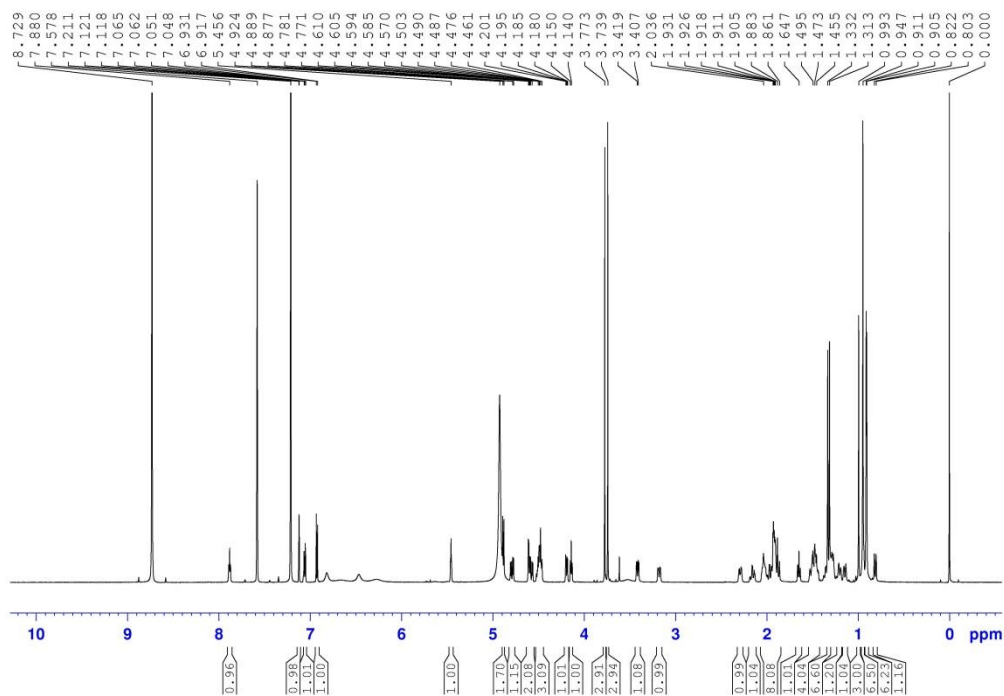

**Figure S11**  $^1\text{H}$  NMR of compound **6c**

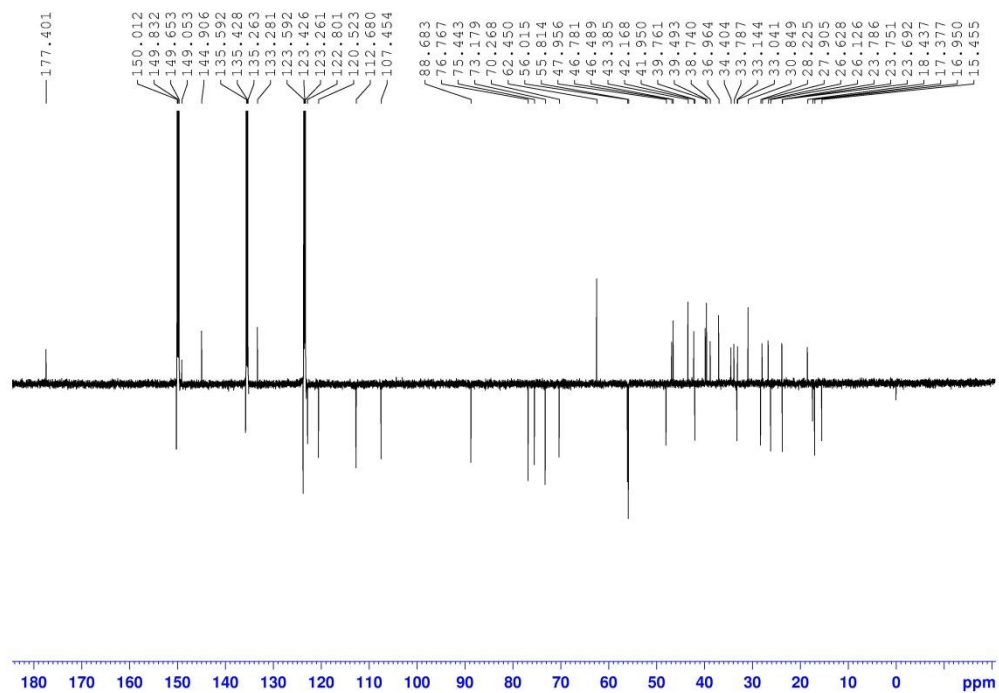

**Figure S12**  $^{13}\text{C}$  NMR of compound **6c**

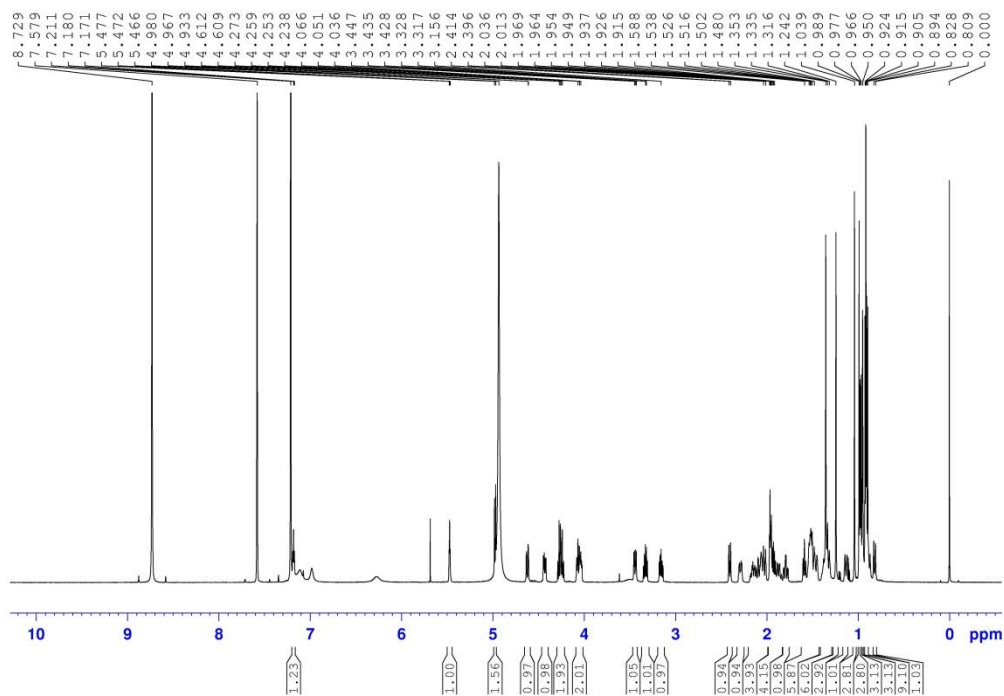

**Figure S13**  $^1\text{H}$  NMR of compound **7a**

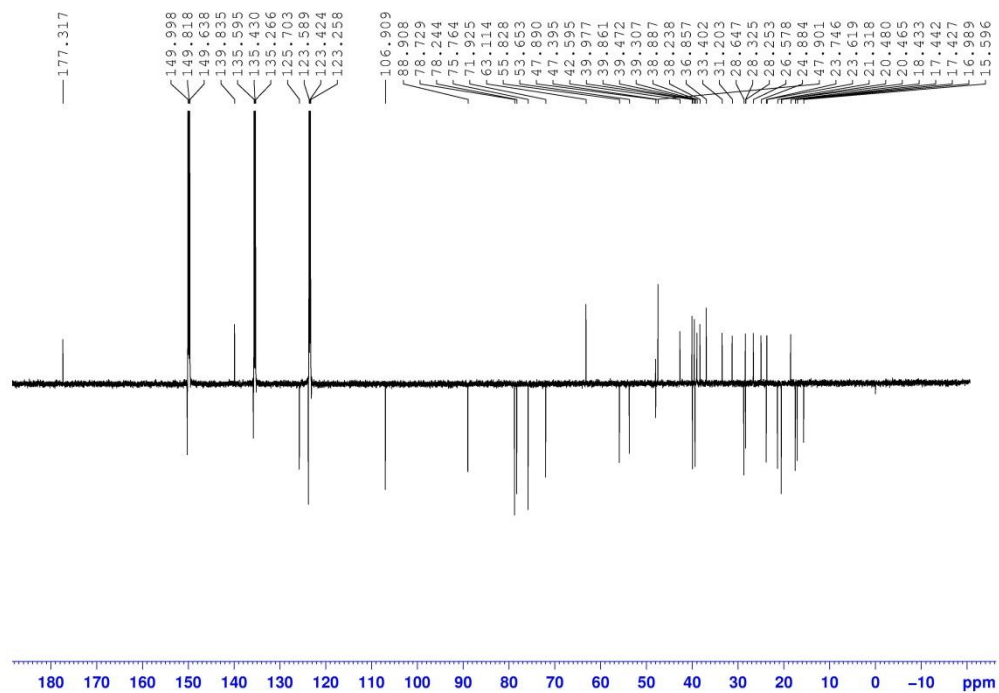

**Figure S14**  $^{13}\text{C}$  NMR of compound **7a**



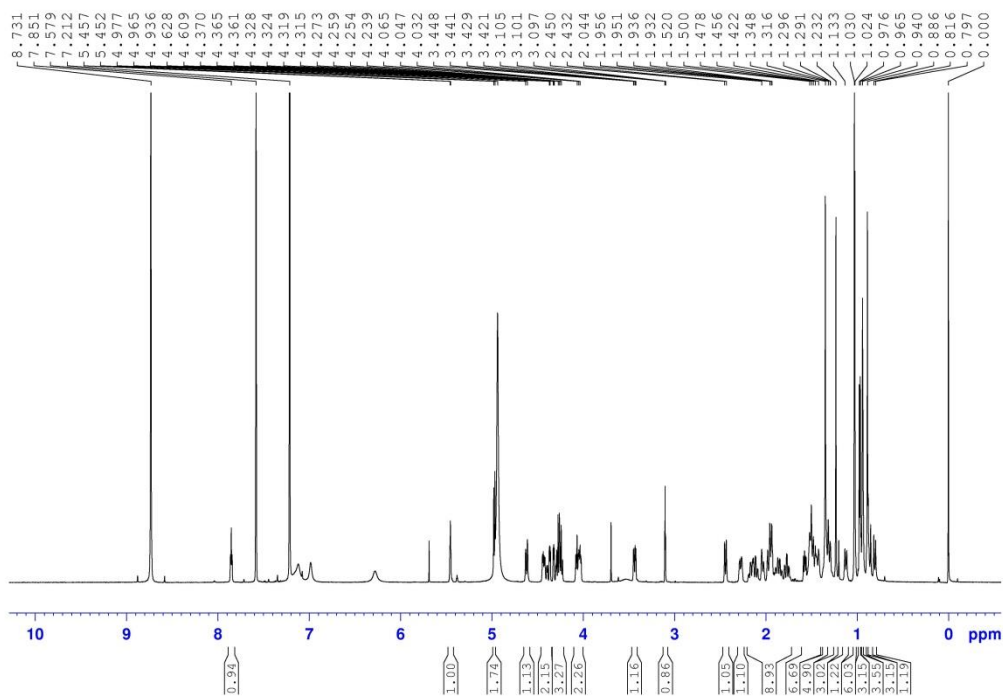

**Figure S15**  $^1\text{H}$  NMR of compound **7b**

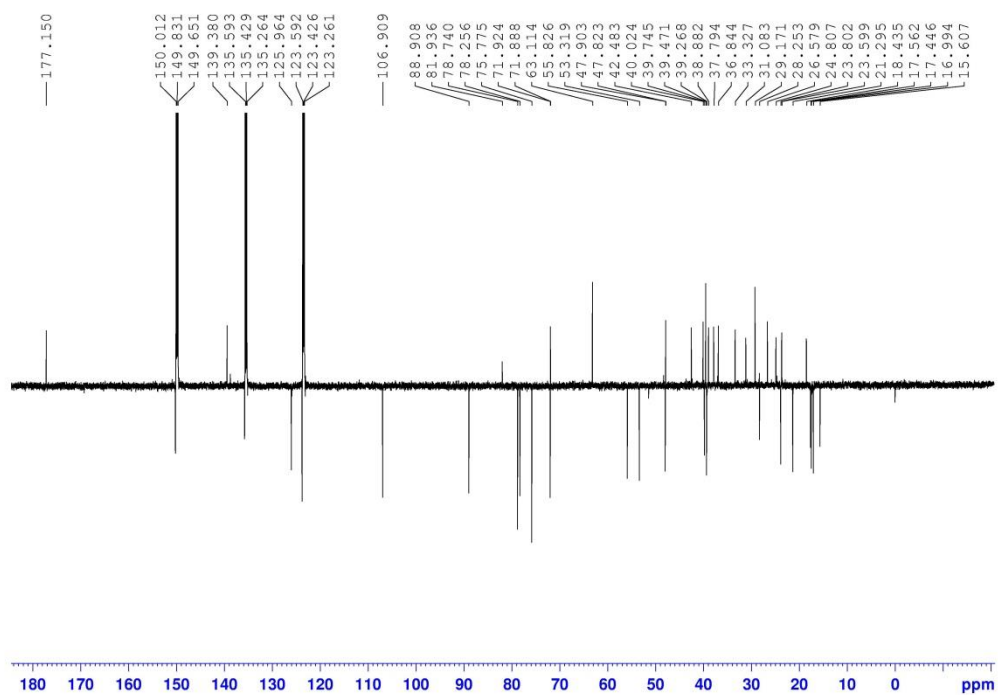

**Figure S16**  $^{13}\text{C}$  NMR of compound **7b**

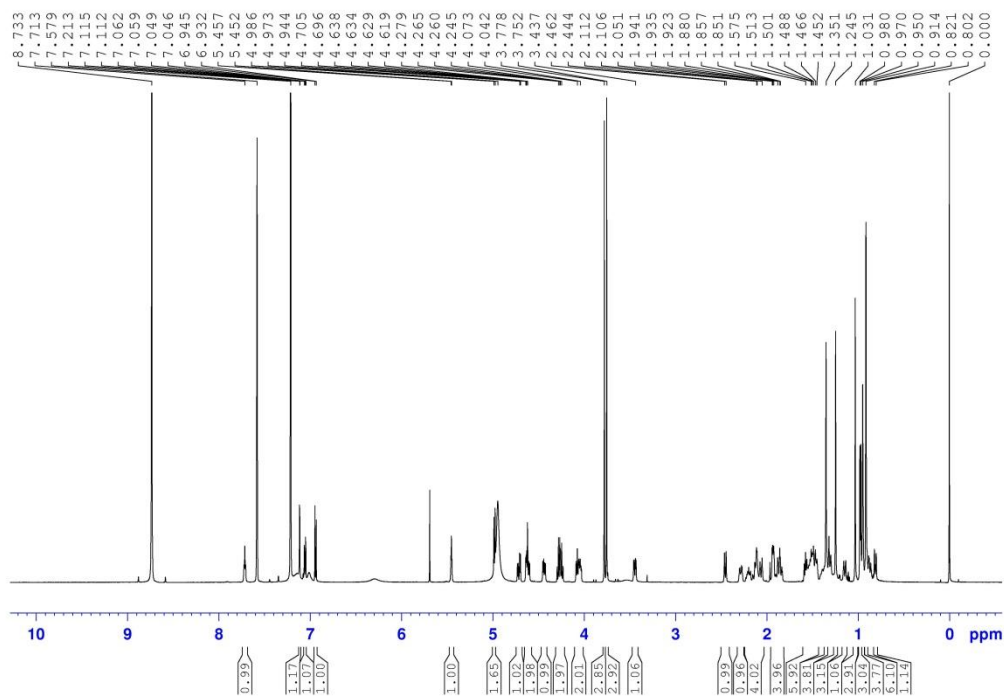

**Figure S17**  $^1\text{H}$  NMR of compound **7c**

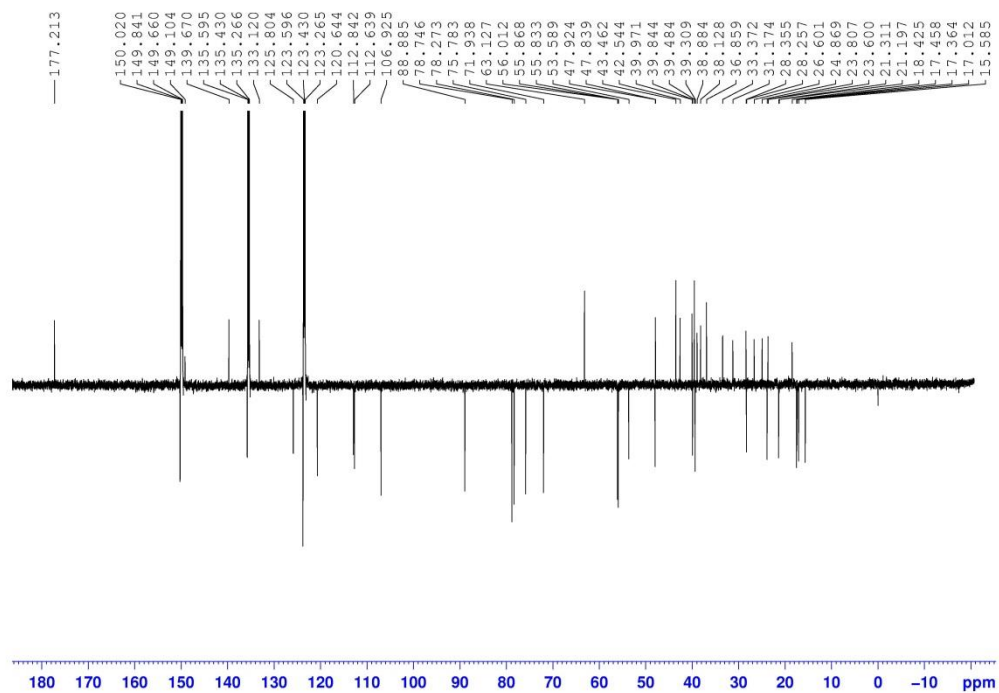

**Figure S18**  $^{13}\text{C}$  NMR of compound **7c**

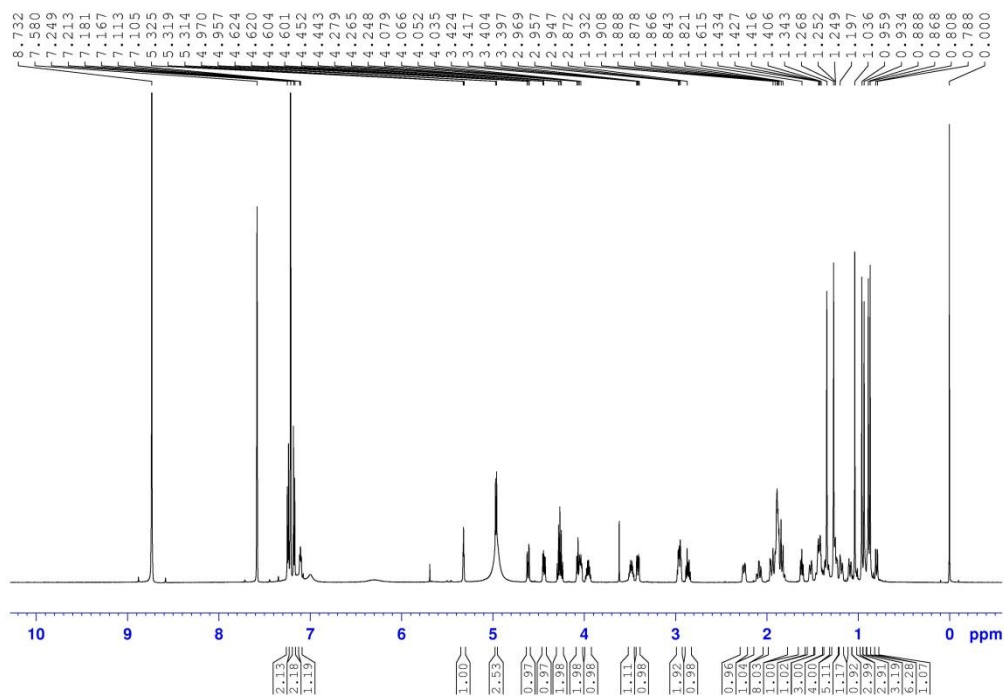

**Figure S19**  $^1\text{H}$  NMR of compound **8a**

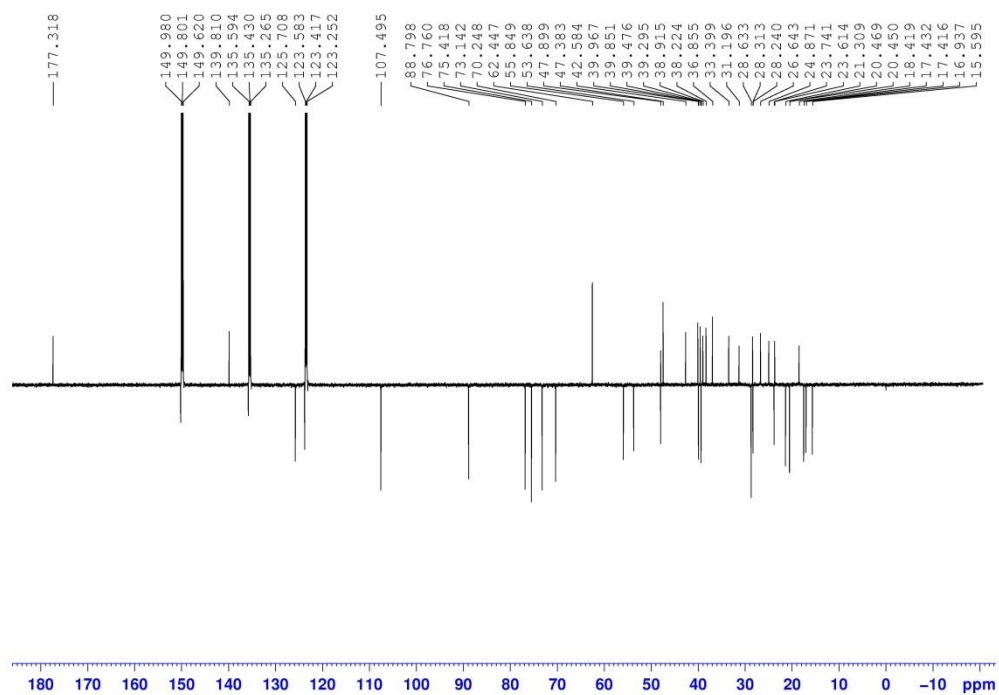

**Figure S20**  $^{13}\text{C}$  NMR of compound **8a**

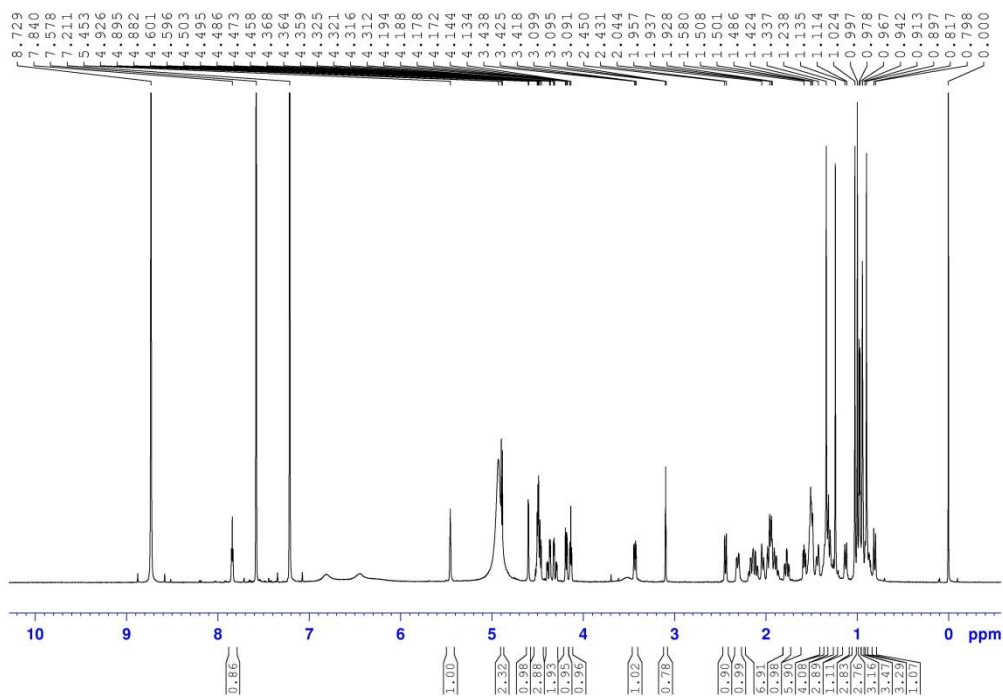

**Figure S21**  $^1\text{H}$  NMR of compound **8b**

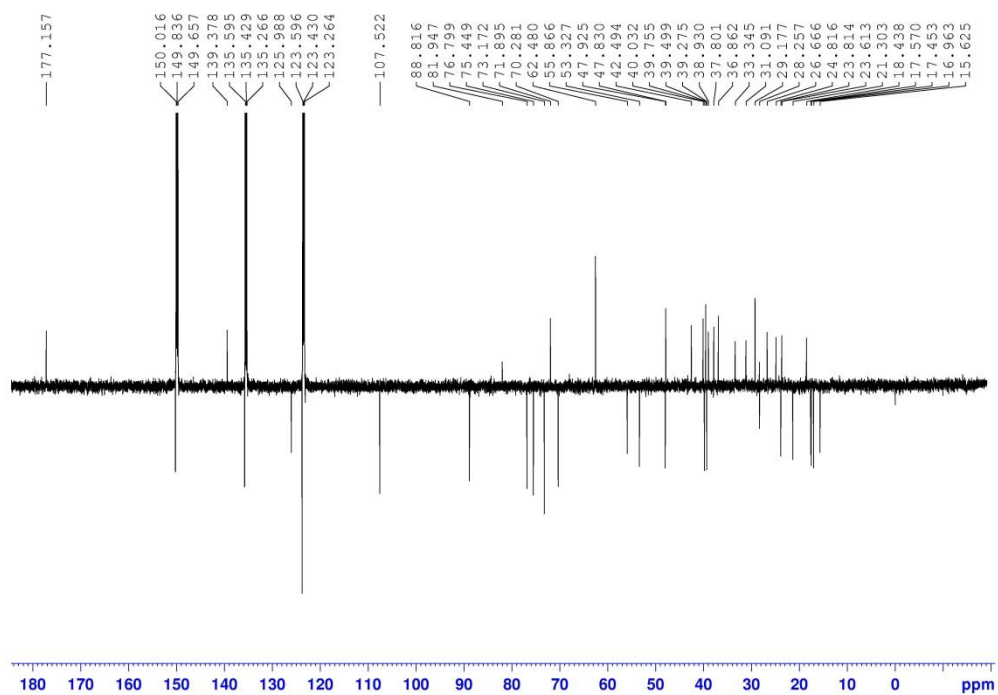

**Figure S22**  $^{13}\text{C}$  NMR of compound **8b**

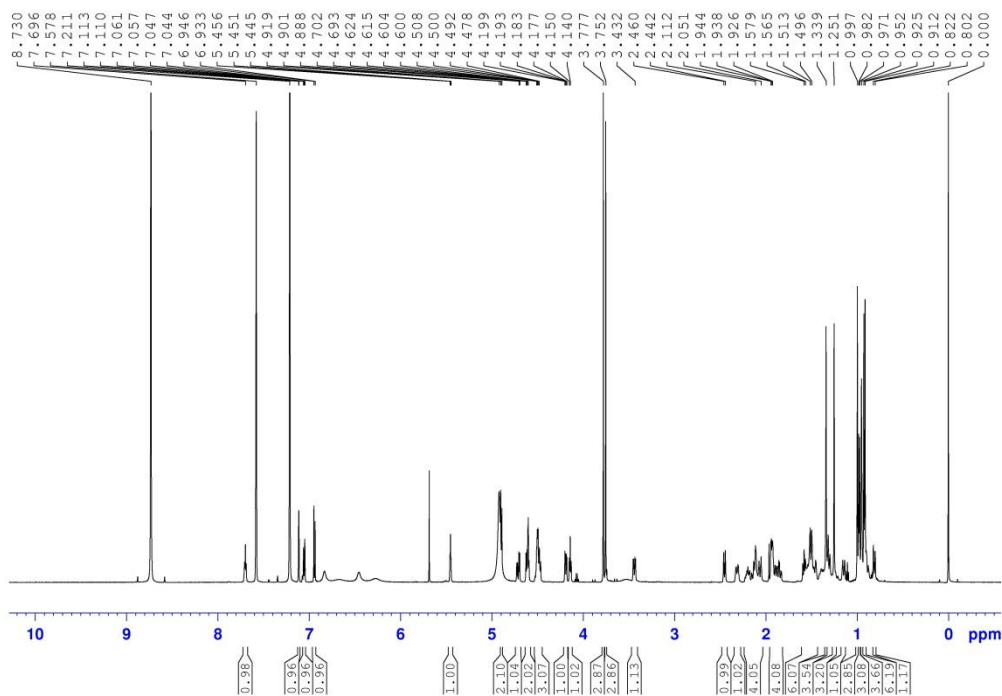

**Figure S23**  $^1\text{H}$  NMR of compound **8c**

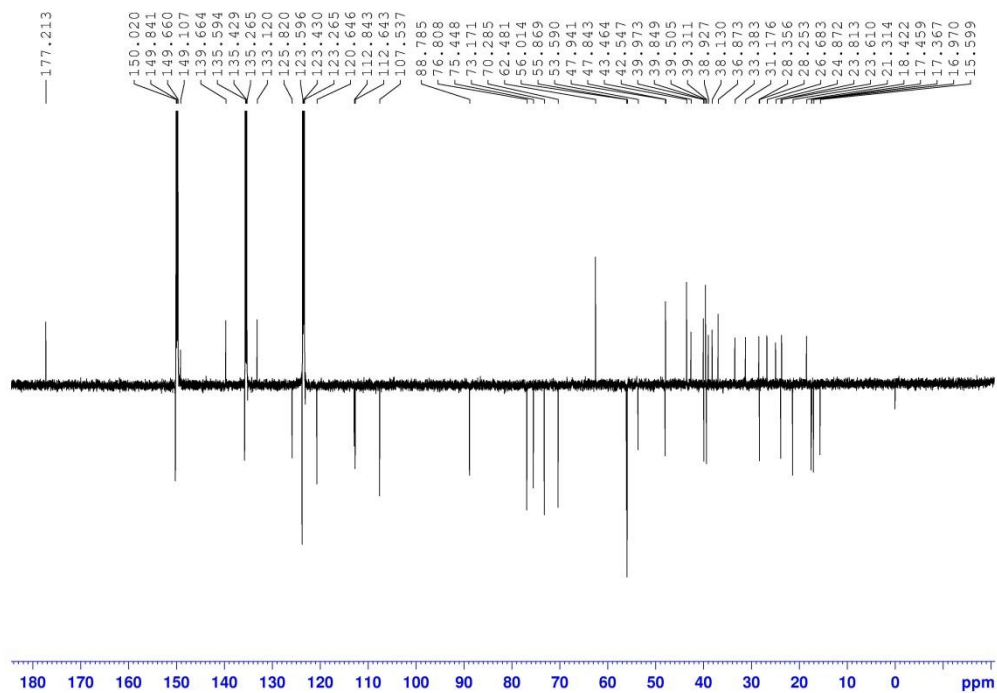

**Figure S24**  $^{13}\text{C}$  NMR of compound **8c**
